# Supplementary material for: Modulating motility of intracellular vesicles in cortical neurons with nanomagnetic forces on-chip
Source: Royal Society of Chemistry journal article supplement (doi:10.1039/c6lc01349j), 2017-01-01
Supplement: c6lc01349j1.zip [file c6lc01349j1.zip]

Archive with 8 entries (8 files):
- SupplData-Trajectories-Kunze-2016-Rev.pdf
- V1-RatNeuron_DiI_ChiwNP-nM.avi
- V2-RatNeuron_DiI_ChiwNP-wM.avi
- V3-RatNeuron_DiI_noNP-nM.avi
- V4-RatNeuron_Activ_DiI_ChiNP-nM.avi
- V5-RatNeuron_Block_DiI_ChiNP-nM.avi
- V6-HumanNeuron-NoNP-noM.avi
- V7-HumanNeuron-NoNP-wM.avi
